# Supplementary material
Source: publisher figshare collection journal article supplement (https://frontiersin.figshare.com/ndownloader/files/12912494)
Supplement: Supplementary file [file 12912494]

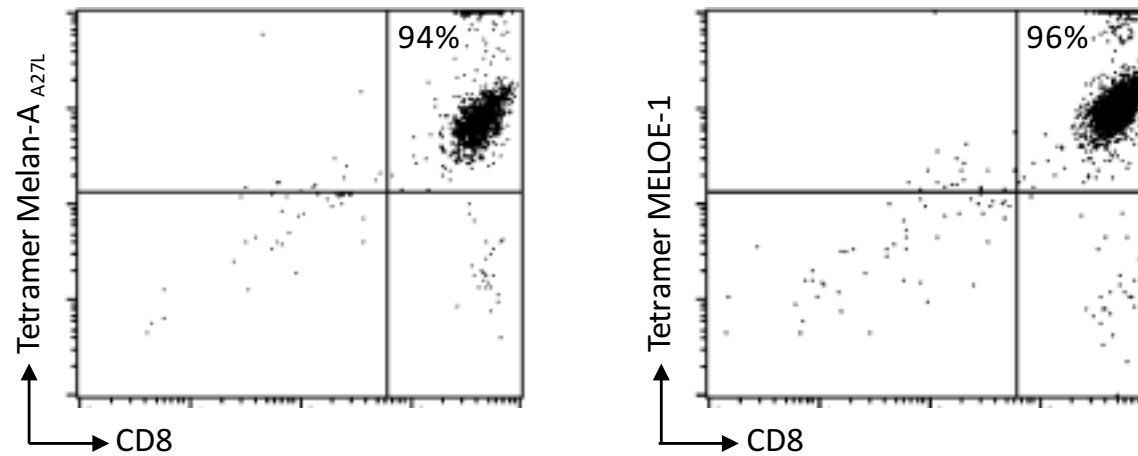

**Figure S1** : representative examples of the purity of sorted and amplified Melan-A (left panel) and MELOE-1 (right panel) specific T cell populations. Purity was assessed through double labelling with CD8 antibody and specific tetramer, and analyzed by flow cytometry.
